# Supplementary material
Source: PubMed Central journal article supplement (PMC3098486)
Supplement: emboj2011115s1.pdf [file emboj2011115s1.pdf]

## Supplementary information

### Legends to supplementary figures

**Supplementary Figure 1** Protein sequence alignment of Sld7 and its homologues in yeasts. The sequences were aligned using ClustalW. The conserved amino acids are indicated by white letters on black (100%) or by shaded letters (> 50%). Sc:

*Saccharomyces cerevisiae* (NCBI: NP\_014703.1); Zr: *Zygosaccharomyces rouxii*

(EMB: CAR26697.1); Eg: *Eremothecium gossypii* (NCBI: NP\_984299.1); Kl:

*Kluyveromyces lactis* (NCBI: XP\_455819.1); Ps: *Pichia stipitis* (NCBI:

XP\_001387485.2).

**Supplementary Figure 2** Protein sequence alignment of Sld3 and its homologues in yeasts. The sequences were aligned using ClustalW. The conserved amino acids are indicated by white letters on black (100%) or by shaded letters (> 50%). Sc:

*Saccharomyces cerevisiae* (NCBI: NP\_011402.1); Zr: *Zygosaccharomyces rouxii*

(EMB: CAR27344.1); Eg: *Eremothecium gossypii* (NCBI: NP\_985529.1); Kl:

*Kluyveromyces lactis* (NCBI: XP\_455566.1); Ps: *Pichia stipitis* (NCBI:

XP\_001382642.2); Sp: *Schizosaccharomyces pombe* (NCBI: NP\_592946.1); Nc:

*Neurospora crassa* (NCBI: XP\_964165.1).

**Supplementary Figure 3** Coimmunoprecipitation of Sld3 and Sld7 from yeast cell extracts. YKK21 (*SLD3-9MYC*), YTT4 (*SLD7-3FLAG-HA*), and YTT5 (*SLD7-3FLAG-HA SLD3-9MYC*) cells were disrupted. The Flag-tagged and Myc-tagged proteins were precipitated using anti-Flag M2 beads (**A**) and anti-Myc antibodies (c-myc Ab-1 9E11) on Protein A beads (**B**), respectively, as shown in Figure 2. After precipitation, the supernatants (sup) and precipitates (IP) were subjected to western blotting, and probed with anti-Flag and anti-Myc antibodies. The asterisk indicates a nonspecific band.

**Supplementary Figure 4** Cells bearing C-terminal tagged *SLD7* (*SLD7-3FLAG-1HA*: YTT4) grow as the wild-type cells (WT: YTT1). N-terminal deletion of Sld3 confers cell sensitivity to hydroxyurea (HU) and this sensitivity is not suppressed by high copy *SLD7*. YKK13 (*sld3Δ::LEU2*) cells that had lost YEplac195-*SLD3* and carried pRS313 encoding the Sld3 (121-668) fragment (Figure 3A) and YEplac112-*SLD7* (*SLD7*) or YEplac112 (V) were streaked onto YPD plates (**YPD**) or YPD plates containing 0.2 M HU (**0.2 M HU**) and incubated at 25 °C for four days.

**Supplementary Figure 5** Levels of the Sld3 and Sld7 proteins in *sld3* mutant cells. The indicated *sld3* mutant cells were cultivated at 25 °C, disrupted, and subjected to SDS-polyacrylamide gel electrophoresis, followed by western blotting and probing with anti-Sld3 (**A**) or anti-Sld7 (**B**) antibodies. The asterisks indicate nonspecific bands.

**Supplementary Figure 6** Specific interaction between Sld3 and Cdc45. **(A)**

Reactions were carried out at 4 °C for 30 min, as described in the legend to Figure 7, with or without Cdc45–Flag on the beads. The Sld3 protein retained is estimated to be 0.06 (Sld3) and 0.03 (Sld3-Sld7) pmol. The Sld7 protein retained is 0.02 pmol. **(B)** The same reaction was carried out, except that Sld3 was replaced with purified GINS (1 pmol) (Muramatsu et al, 2010) or Flag–Sld2–P1 (1 pmol) (Tak et al, 2006). Sld5, a subunit of GINS, and Flag–Sld2–P1 were detected with anti-Sld5 and anti-Sld2 antibodies, respectively.

Supplementary Table 1. Yeast strains used in this study

| Strain name | Genotype                                                                                 | Source & Reference*      |
|-------------|------------------------------------------------------------------------------------------|--------------------------|
| W303-1A     | <i>MATa ade2-1 can1-100 his3-11,15 leu2-3,112 trp1-1 ura3-1</i>                          | R. Rotstein              |
| YYK9        | <i>MATa ade2-1 can1-100 his3-11,15 leu2-3,112 trp1-1 ura3-1 bar1Δ</i>                    | Kamimura et al. (2001)   |
| YTT1        | YYK9, <i>sld7Δ::LEU2</i>                                                                 | This study               |
| YTT4        | YYK9, <i>SLD7-3FLAG-1HA</i>                                                              | This study               |
| YTT5        | YYK9, <i>SLD7-3FLAG-1HA SLD3-9MYC</i>                                                    | This study               |
| YTT6        | YYK9, <i>5FLAG-SLD3</i>                                                                  | This study               |
| YTT7        | YYK9, <i>5FLAG-SLD3 sld7Δ::LEU2</i>                                                      | This study               |
| YTT9        | YYK9, <i>6FLAG-PSF1 sld7Δ::LEU2</i>                                                      | This study               |
| YYT2        | YYK9, <i>6FLAG-PSF1</i>                                                                  | Takayama et al. (2003)   |
| YYK14       | W303-1A, <i>sld3-4</i>                                                                   | Kamimura et al. (2001)   |
| YYK15       | W303-1A, <i>sld3-5</i>                                                                   | Kamimura et al. (2001)   |
| YYK16       | W303-1A, <i>sld3-6</i>                                                                   | Kamimura et al. (2001)   |
| YYK17       | W303-1A, <i>sld3-7</i>                                                                   | Kamimura et al. (2001)   |
| YYK18       | W303-1A, <i>sld3-8</i>                                                                   | Kamimura et al. (2001)   |
| YYK19       | YYK9, <i>sld3-5</i>                                                                      | Kamimura et al. (2001)   |
| YYK21       | YYK9, <i>SLD3-9MYC</i>                                                                   | Kamimura et al. (2001)   |
| YYK13       | <i>MATa ade2-1 can1-100 his3-11,15 leu2-3,112 trp1-1 ura3-1 sld3Δ::LEU2 [YEpl95SLD3]</i> | Kamimura et al. (2001)   |
| L40         | <i>MATa ade2-1 his3-Δ200 leu2-3,112 trp1-901 ura3-1::LexA-LacZ Lys2::LexA-HIS3</i>       | Bartel and Fields (1995) |
| BJ2168      | <i>MATa pep4-3 prc1-407 prb1-1122 gal2 leu2 trp1 ura3-52</i>                             | Laboratory stock         |

\*Bartel PL, Fields S (1995) Analyzing protein-protein interactions using two-hybrid system. *Methods Enzymol* **254**: 241-263.

Kamimura Y, Tak Y-S, Sugino A, Araki H (2001) Sld3, which interacts with Cdc45 (Sld4), functions for chromosomal DNA replication in *Saccharomyces cerevisiae*. *EMBO J* **20**: 2097-2107.

Takayama Y, Kamimura Y, Okawa M, Muramatsu S, Sugino A, Araki H (2003) GINS, a novel multiprotein complex required for chromosomal DNA replication in budding yeast. *Genes Dev* **17**: 1153-1165.

*sld7-1* (G42R)

#

|    |                                                                                                      |    |
|----|------------------------------------------------------------------------------------------------------|----|
| Sc | ---MSRKLCTNFTLSGKQGSVIRDIQLWSNR---PTASKSTSELRGQFIQYVDLAKLPLWVRSTNMNTYRCYSTSATAQAYFKSKLR---NANRGIV    | 90 |
| Zr | ---MLEQNAVLFKFTLGEKYDDIIVKDVQLWSQE---PPKADGIKQLKGRLLQYVDMNKLPLWATTGSKN-YVVYTWRSSTTSYFASKLK---NENRGIV | 89 |
| Eg | MASDWDKWFELRLAVG---RQVLRDVLWQRRGS-SSSRPASHTGLTGRLLQAIQLDRLPVWAGR--SNRYRCFSSTTIRAFFAAKLLRRRHRARGLV    | 94 |
| K1 | --MTLEKELIIRLNVG---HNTVIRDVQLWREFED-GDQIYAVKNCLA-EVVGVMNIDKLPFWLNR--GQRYQCFTTSETSVNYFRAKLMRQRHRNRGIV | 91 |
| Ps | ---MKKLATFVINDN--YPSNVLEDVQIWSGSDTKESDNLSEVPTSYSERMPIYVNHRLVRYLLS--ARPLSVFSTSSITSEYFKQTLKQAVYNRDI    | 92 |

|    |                                                                                                     |     |
|----|-----------------------------------------------------------------------------------------------------|-----|
| Sc | IELFDKVDQRSQEPAYLIFREN-----TELNCFQVDLTMKHEFDGOVTKLKQDIGKTRASVSKEG--SIDIIQQSQQRK-----IGTKTEV         | 171 |
| Zr | IDLLNGTNNNDH---LLILHRKL-----KKVQCLKLNINVKRKFQNL-----ISRTVQTSKEG--SIDSTVQSQQRN-----QFKAKTI           | 161 |
| Eg | VELLAP---TRASKEYLIFHKELGADS--HFELCWFTLDSRKHADAALKP-----VLPAAAR-----IDTLVLRSGARR-----RAAENRQ         | 165 |
| K1 | CKVTGSQVLTKEQFEYFLFYKRLKTDINASFIEESMLHSTKHELDKLIPLSADELQSVVPSNAGATMSIESTILEKNRQR-----ILKSNSL        | 181 |
| Ps | LIFKSGRDETYLIFYFDYFKKQIMVLIIDFSRLAEIDAILEKDAVQDPDNTKNTFILLNQTRQDDRST--VFDKVLQRKKSRSNSNPVWESVQNSTTAK | 190 |

|    |                                                                                                      |     |
|----|------------------------------------------------------------------------------------------------------|-----|
| Sc | YRNVHINDKRLQFNETLSKLLGGLRLRGISN-----SITDYOKLYKITFDAAEFTHRDELKRIS-----MGSGEVVSFESLQETVEILLKLF         | 254 |
| Zr | RNHVRTSEKKITFNETLSKLLGGLRLRGIPN-----TQSGFQKLYKITFDAAEFHRDELK-----HSDAEVPPFETLQETVEILLKLF             | 240 |
| Eg | -DPANTSARQRFVARLSQCILGGLRLRAVP-----QARYEKLYRAVFQASEFAFRDELA-----ASADVPFEALQDCVETILLKLF               | 240 |
| K1 | NKQVLLNDQQQFMSLLSQCILGGLRLRGVH-----RTQHEKLYKMTYKASEFAFRDELK-----ETEPTISFESTQDCVETILLKLF              | 257 |
| Ps | LLSSSILSTQDQIHQAVNKITLGLRLRGLSTNLNHSVNEKLTIKEIYQMTYKSTMESLRKHNYTFSGTSSSKGTNTSNKSKQIRLSELQDTIEKLLLEIF | 290 |

|    |        |     |
|----|--------|-----|
| Sc | TKS--- | 257 |
| Zr | CKS--- | 243 |
| Eg | TRS--- | 243 |
| K1 | TKT--- | 260 |
| Ps | VDVDGI | 296 |

Supplementary Figure 1

|    |                                                                                                      |      |
|----|------------------------------------------------------------------------------------------------------|------|
| Sc | ME---TWELIASVKEATKGLDLSLDHPLIISKSEVDPNSILQLLQKNNRQLKHCIM-----KSRKEYFLLEEVGPG-----FWWKWPYNFYNGYS      | 82   |
| Zr | MS---SWRLVASVRTLPSSRLRELDGAQVNSYEEFVNPISSESR-ANKIGLRHLIHL-----NPDK-YCVLERYGNG-----FWIRYDVLQMD---     | 77   |
| Eg | MD---LNTVCLIGSFVRVPRNLIFFEEPRIVEG-AALPDTVREISNKDVTIKHLK-----TGDGHAYMVERYEGE-----TWLWVCEAPADQT---     | 83   |
| K1 | MDTSARQWVLIICFLKLPAGFEIDETSVDLVLKSSSEFQQVQANIKATDVVLLKHLR-----NGD-QFIILHIFYDQ-----SNLRWGLVKVPNQE     | 85   |
| Ps | MSAAEEKNGKIDKGRDVTVKLPFSFEVAQAALDSYPLVITILQTLQAADLQHLSSSTI-----DNSSISKALDSEADSGS-----ISKWIFKVSEIQIAG | 89   |
| Sp | M-(25)-WPLVTVPRQCICLRWCISKYEHEFTCSSLQFIVIRPAGTSLVLLGRVKSXK-----ANQLVGEHVEGSRYALIFLSEKDFKSLKVIANH     | 111  |
| Nc | M-(78)-SVVLRPRPSTLTDKPRILSPLMLPREHLPLSALDLLQPGQDFPPSRFYE-(21)-EANRMLYAIERESDGLYTLCKLGSWVDVILAQAATV   | 186  |
| Sc | LPRRTEVVTTERERAK-----RETLLKTDDELKFKELHLHWS-----EPPKGSCKLEKDKDLK-LDMNPPDMKGESKINDYYS-----             | 156  |
| Zr | LQVEVEFTG--NEHLIN-----WAAIKENLWMLGFKDLPLWK-----EDVMS--RPASQQVVD--LEMKPPGED--KSHNEVIKLD-----          | 146  |
| Eg | LYEKS---YKRHRTRACYE-----AKTLAEWERYDVPPELLGFQW-----EDVDSEPLNAYEGLE--LDMKPPDALPAPTAPAVSG-----D         | 155  |
| K1 | SIGHDKPNYKEQVSTRYD-----VKTLDEWCDLSIEDILPYWK-----EDRQKIPDGMPEQLP--LVMKPPGFSYKEMVIDEHGSGSFI-----HRQ    | 167  |
| Ps | LSTISYSYFFVKQKRLA-(31)-AVESNQRIASFGTKEIIVDYSMLDEDLHLQSSDDMEIDQMLENFSMDPPMNNLSETKSDATNSANDANILVSPSS   | 214  |
| Sp | QLTKSSKSLSNVSNKPLG---DQLFRSNLSMSPSLKKEIHRIQSDASQANERESQAPHSFVTHDLISSSKDGNLSLTHEFANDSVTEMVQDYTPSCSRD  | 207  |
| Nc | VSSQRMKCKPKQLEVA-(18)-AIEEIQSSLTRKRSNTTTEQESLSHLPTPTSGSPESKSCESCQIAEPAEVPTVSNKPDLPATLPHPAEDVLSQPT    | 298  |
| Sc | ---PKEYIESKYIDALFSIHTPLAYFVKSNIIVRLKNTKRTKYGSDSYKIAYQAMQKFLLSIVQFKDRHDNRL-----LLEPFSSPIADEKRKNCLTKF  | 247  |
| Zr | ---PATFLKAKYDLSFNHILPLAYFVKSNIIVRLKNTKRTKYGSDSYKIAYQAMQKFLLSIVQFKDRHDNRL-----LLEPFSSPIADEKRKNCLTKF   | 234  |
| Eg | YADPQLYLNKYYEALFQLRIPLAFFVKSNIIVRLKNTKRTKYGSDSYKIAYQAMQKFLLSIVQFKDRHDNRL-----LLEPFSSPIADEKRKNCLTKF   | 243  |
| K1 | ELDPSSYLQOKYEMLYSLNDPLAHFVKSNIIVRLKNTKRTKYGSDSYKIAYQAMQKFLLSIVQFKDRHDNRL-----LLEPFSSPIADEKRKNCLTKF   | 255  |
| Ps | IEDPVIFKSRYYNTLYSLTTPLSYIPKTAIARFNLCSNDNRKIS-----DLAAGLCLSVHQMADARHHGKH-(19)-LEIQNQDQFISRHEKIQDIL    | 321  |
| Sp | VKSLDLHLNYSFYQLMTRKTPVVFYVQMGVGTQRLAVEVHNHVEEK-ALVDELKFLDNLKSVDKRSRLL-----QCFSHNLNYKAWHLEFENEAH      | 300  |
| Nc | AEGIFQIRMQFLEALYHSGKSLAYFAMGPLSRARAFAHLDGCSNLEMSHLIDFLRGFVMTTALIDKKYRETL-(12)-DSEQGHARSKPRKRVRKQKL   | 404  |
| Sc | VIQ-----DENKNSSTIADLCVVLKSRREIKLQILLLEIIGLNDLWVFRDFEKYKYLK--KRSNLTKKGLVRRRSK--TSEKDKGIERITTS         | 336  |
| Zr | GVRVSGDFNDNDNQSSSIKELPGILKIREIKLQIILLLEIIGLNDLWVFRDFEKYKYLK--KRSNLTKKGLVRRRSK--TSEKDKGIERITTS        | 330  |
| Eg | KDFEKLNDHLDLDTSSYAAELAQILKIREIKLQIILLLEIIGLNDLWVFRDFEKYKYLK--KRSNLTKKGLVRRRSK--TSEKDKGIERITTS        | 335  |
| K1 | RDTLGVDIERMQLN-DVISDISNLIKVRDILKQIMILLLEIIGLNDLWVFRDFEKYKYLK--KRSNLTKKGLVRRRSK--TSEKDKGIERITTS       | 348  |
| Ps | KTEKPSNHPITVDAAGKVTQESSEKFFQRIVLELKMREAQLQITLLELHSHWIDESNLE--SNACKLEKEEKRAKESNVLVRRKKSSTRKIVP        | 419  |
| Sp | QYIEKGYRLWQILNRENQCITKLDFEREFSQLKKEYEIRVLLYFEILYFLKWDPEYARR-----RANDNSLDSRDSGK--RKSRRKNAKTLNPF       | 382  |
| Nc | KDGLYPSSEEHIERWVTHKPSSTQDEKMAATEAKHHSIALRRRETQLQMIILEILALEPLNRPVVATEDNELPGLTQETIGGTYSERNRKNKT        | 504  |
| Sc | LDYCEQLDLYLDRAICLIDILSSETPNPDAEASNG-----TIOEHKKNILDKSKESLVGFINYVLIPYFNKKVPHAVEFIIQKLGKSPMRPKR-----   | 426  |
| Zr | LDYCEQLDLYLDKIICLIDILASEPAGPE--DENID-----TIOEHKKNLNNKHESSAGFINYVLPYFAKRVNNAVKFTIQKLGKSPKLSRK-----    | 418  |
| Eg | LDVCEQLDILLDKMAIDIDILSSESVSNGKAPSNKNETHELLAEHKNLNRDGEESLGFIRYVLPYWSRKPNTVAFITTKIKGLNMQRCA-----       | 430  |
| K1 | IDYCNLDLIDLKLGAELISTEISLHSEQPPIN-----KLTHEYKQIVNKNKEISSKGLSYVVPYVYKKLRFVVFITNKIKGPTMEKPP-----        | 438  |
| Ps | TFLMGVDVNNENSTTFPTALIDQLTVYKNLNAIVDR-----MGLWDMLLGSSEKKNENSIQFIAYVLPYVYKKLRFVVFITNKIKGPTMEKPP-----   | 515  |
| Sp | ETAQLKLEFTFDGLCIRRTIQONAT-----ERSEDLLKFKCKETIIPYYSKFRITRNLLEKCNGLDILLPER-----                        | 460  |
| Nc | PNLPLLLDMHADRLCIWQSTTLEDEKALTESQPSAE-----EQEAPAEENNSDPLRDFCVDIIIPFFSARLDELCDFINRKLGGPVIQAPK-----     | 590  |
| Sc | --ALKVNDSTNVSSPNTVETYNRLSTSQRASRSSIINSVPSSPALRR-----VDANLFSRKSIAASPTPELLN-----SRTNSNLNEFLESETRSLKR   | 512  |
| Zr | --TERTVPERGSSS-----LADARHES--VSRLSSTPSSPQLT-----PAVPWHRHSSAN--QELLS-----TKTGSNASALFSGSLLK            | 490  |
| Eg | --VSSQSSSI-----QEGSTTTRRSFSNLPISSTPS-----SPSPTTSSGSSVIAPKLMK-----AKANSNLEFLESESSLNKH                 | 503  |
| K1 | --MNAQQT-----NSNRSRAGSISS-----VSDGKRSPQMPPLR-----TRTNSNLVEFLEEETTK--KQ                               | 492  |
| Ps | KLTSRQDPELPSNTPNETHTPIIEEQKKSKEYKVVLRKVPKLEK-(12)-KPALSLLKSSSNLSYKNLKK-(14)-SNSKANRSNLSSEKSSQQTQ     | 629  |
| Sp | --SHKHRHSAPPRS-----KLISSEAGRALPGNTSGASISN-----TSSPHSEASISKDYELKR-----RRSNSGVHSLTRSDSFGNG             | 535  |
| Nc | --EKAKTVAATKPKGAPGRVAATKKNERSLQRVLSNERMRRSVSRGP----SGTIALLSASATAIPGLKR-(40)-AKKKARLAELEKAIISALK      | 718  |
| Sc | PSQLGR-----TKSDLTMMHLQKRO-----FVSVDLSTTRVPNSSTITLKT-----PFSHST-----INAYKTMNSFRVRGKRKIDINETIR         | 584  |
| Zr | PAFISR-----TKSDLTMMHLQKRO-----LSVTDLSSN-----DRNMTANDE-----KNNGER-----VRLLTQSQKSFRRVGIKRGEREVDP       | 559  |
| Eg | PSTLSK-----SNSDLALNRLQKRO-----LAVTDLAASATRNGSYEGIGNSSKGANRSFISAK-----QSFKRASKRKLQDITESKVGANTGV       | 582  |
| K1 | PKMASR-----SSDCLKLNRQKRO-----MSVQDLSDDDIVKQKQIIEEFSTVRTLVNGKA-----INISQSHNSFORVGRKRLAS----           | 567  |
| Ps | SFIFGN-----AKKTRLKSTVQRN-----HSSAQILATPMKNKSAPIIPTAYTDLKRASITDS-----HSQVEATPNNAVRVIDMSDVINTPE        | 708  |
| Sp | ERDTRR-----RSSDIARIKNRE-----INLPSSSLKQRNSMHDISTNFRPRNLSTFE-----KLTMASLQGSSESVQPKTTSSLSR              | 609  |
| Nc | PNRALAGKEVEEAERTAPQPKSKLNKKO-(42)-SSASVVPASTLPRKFTNVFATSTSPNIGAHPSSE-(33)-EEVEEATPVPPKMEELHVQATPMR   | 881  |
| Sc | LHERVDSEENQVQATPAVKKRTVTPNKAQLQSIIISPLN----FKDDDTHEGRKNTSNITSTPTN----KPPENSSKRRVRRRLFAPEST           | 668  |
| Zr | PKAGKEETEAVQVMTPLVKVSGGTPSKRAKLQNIIVSPVWAGASAQSTNIKLNQSSPIVYGTPOQNYEPTQNGNKSRRKIKRRLFAP              | 649  |
| Eg | VQITATPARTLAKPAAEKMTIVKSPFSEAKQATSLVEIAATPLRNHPSESSAPVFEQHGIVKTPVNRNDNASGINKPKAK--KVRRLFAP           | 671  |
| K1 | -----YISETGFDDKQD---IHVTATPIKPIEKKDTPVLVAS---PSVVSETPVRASVVKVTR--HVRRLFAP                            | 631  |
| Ps | DHFVNLKHNFTQPKSHSVDKLSVSLAVDNGSHITSSPVKSPGFQSNWITDPIQVESTPIASVRRNNIINSANSSKSKKSKPGEDVS-(57)          | 858  |
| Sp | SKTLSELGSSKRSEPSMDSILVQATPRKSSSVITELPDTPIKMSLDAKASACTVENHIVTESPAHKSNAQALFVCPVTPPVKKKSASP             | 699  |
| Nc | KQRFQQLKLPVPRPEGLVQVQATTPQRKRAIQGTPMRKKSLSQLPQVVEEDPLTHSIPSSSIFAKRLTIASPFNRAAKQQQQLVPTTP-(117)       | 1091 |

Supplementary Figure 2

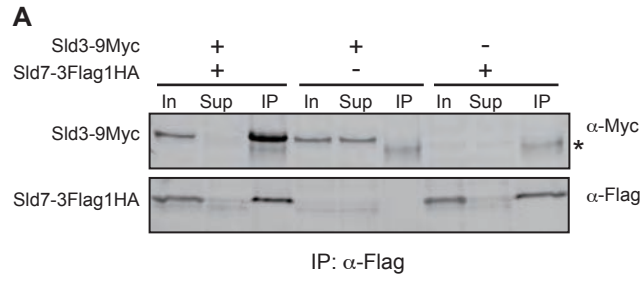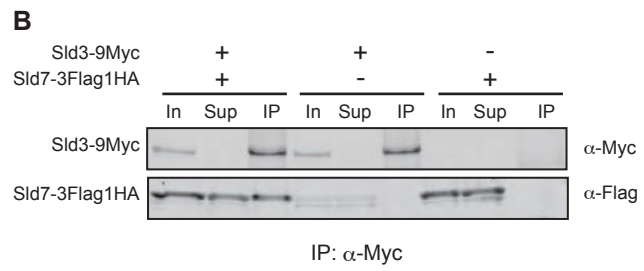

Supplementary Figure 3

YPDA

0.2 M HU

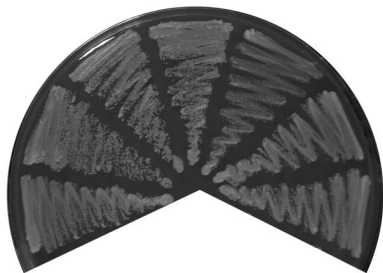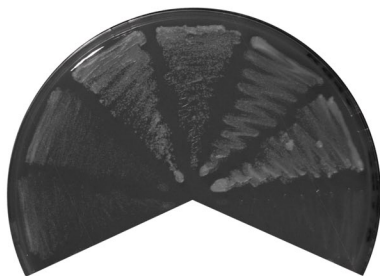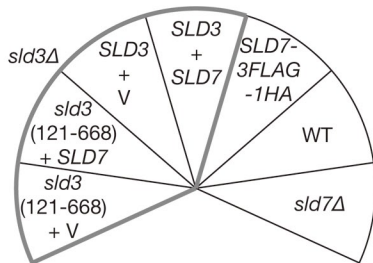

Supplementary Figure 4



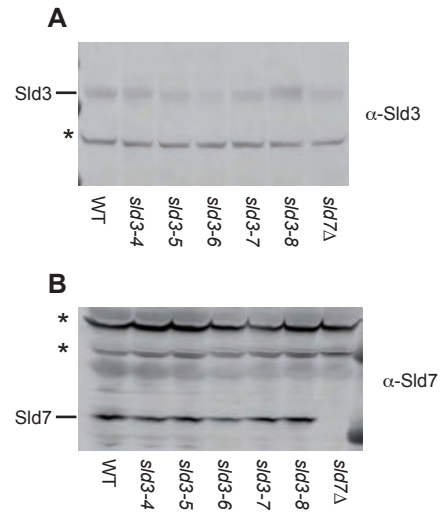

Supplementary Figure 5

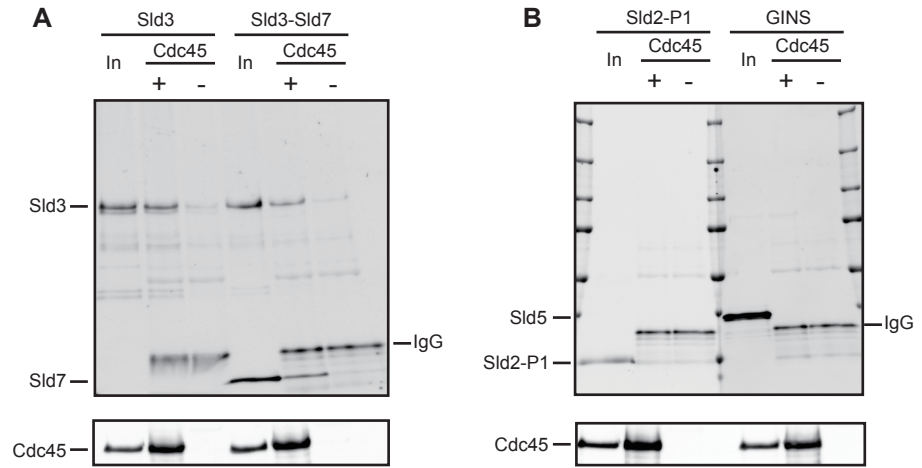

Supplementary Figure 6
